# Supplementary material
Source: PubMed Central journal article supplement (PMC7158904)
Supplement: mmc1.pdf [file mmc1.pdf]

# THE LANCET

## Infectious Diseases

### Supplementary appendix

Supplement to: Yu N, Li W, Kang Q, et al. Clinical features and obstetric and neonatal outcomes of pregnant patients with COVID-19 in Wuhan, China: a retrospective, single-centre, descriptive study. *Lancet Infect Dis* 2020; published online March 24. [https://doi.org/10.1016/S1473-3099\(20\)30176-6](https://doi.org/10.1016/S1473-3099(20)30176-6).

This translation in Chinese was submitted by the authors and we reproduce it as supplied. It has not been peer reviewed. *The Lancet's* editorial processes have only been applied to the original in English, which should serve as reference for this manuscript.

此简体中文译文由作者提交，我方按照提供的版本刊登。此译文并未经过同行审阅。医学期刊《柳叶刀》的编辑流程仅适用于英文原稿，英文原稿应作为此手稿的参考。

## 摘要

**背景** 2019年12月以来，武汉市出现了由新型冠状病毒（SARS-CoV-2）引起的新型冠状病毒肺炎（COVID-19）。妊娠期感染 COVID-19 的孕妇数量在不断增加，但关于妊娠期感染 COVID-19 的相关信息非常有限，本研究旨在探讨妊娠晚期合并 COVID-19 的临床特点和母儿结局。

**方法** 回顾性分析 2020年1月1日至2月8日华中科技大学同济医学院附属同济医院单中心收治的妊娠合并 COVID-19 患者的临床特征、治疗和母婴结局。

**结果** 7例妊娠合并 COVID-19 患者平均年龄为 32 岁，入院平均孕周  $39^{+1}$  周（ $37\sim 41^{+2}$  周）。临床表现中有发热（6例，86%）、咳嗽（1例，14%）、呼吸急促（1例，14%）和腹泻（1例，14%）。7例患者在多学科会诊后行剖宫产终止妊娠，平均分娩孕周为  $39^{+2}$  周。孕妇和新生儿结局良好。对其中 3 名新生儿进行 SARS-CoV-2 咽拭子核酸检测，1 名新生儿在出生后 36 小时咽拭子核酸检测呈阳性。

**结论** 妊娠期感染 COVID-19 患者的临床特征与既往报道的非妊娠期患者相似。在目前缺乏大数据支持的情况下，全面、积极、主动的围产期管理可能是晚期妊娠患者获得良好妊娠结局的最佳方案。
