# Supplementary material
Source: PubMed Central journal article supplement (PMC7158904)
Supplement: mmc2.pdf [file mmc2.pdf]

# THE LANCET

## Infectious Diseases

### Supplementary appendix

This appendix formed part of the original submission and has been peer reviewed. We post it as supplied by the authors.

Supplement to: Yu N, Li W, Kang Q, et al. Clinical features and obstetric and neonatal outcomes of pregnant patients with COVID-19 in Wuhan, China: a retrospective, single-centre, descriptive study. *Lancet Infect Dis* 2020; published online March 24. [https://doi.org/10.1016/S1473-3099\(20\)30176-6](https://doi.org/10.1016/S1473-3099(20)30176-6).

**Supplementary Table 1 Maternal laboratory results of patients with COVID-19 pneumonia**

| Characteristics                        | patients with COVID-19 pneumonia (n = 7) |                  |                   |                   |                  |                   |                  |
|----------------------------------------|------------------------------------------|------------------|-------------------|-------------------|------------------|-------------------|------------------|
|                                        | Case 1                                   | Case 2           | Case 3            | Case 4            | Case 5           | Case 6            | Case 7           |
| <b>Imaging examination (chest CT)</b>  |                                          |                  |                   |                   |                  |                   |                  |
| Typical signs of viral infection       | Yes                                      | Yes              | Yes               | Yes               | Yes              | Yes               | Yes              |
| Bilateral pneumonia                    | Yes                                      | Yes              | Yes               | Yes               | No               | Yes               | Yes              |
| Unilateral pneumonia                   | No                                       | No               | No                | No                | Yes              | No                | No               |
| <b>Blood routine</b>                   |                                          |                  |                   |                   |                  |                   |                  |
| Leucocytes ( $\times 10^9$ per L)      | normal                                   | normal           | normal            | normal            | normal           | normal            | normal           |
| Neutrophils%                           | increased (80%)                          | normal           | increased (76.3%) | increased (81.2%) | normal           | increased (83.5%) | increased (87%)  |
| Lymphocytes ( $\times 10^9$ per L)     | decreased, (0.97)                        | normal           | decreased, (0.89) | decreased (1.11)  | normal           | decreased (0.64)  | decreased, (0.9) |
| Platelets ( $\times 10^9$ per L)       | decreased (83)                           | normal           | decreased (116)   | normal            | normal           | normal            | normal           |
| HB                                     | normal                                   | normal           | normal            | normal            | normal           | normal            | normal           |
| <b>Coagulation function</b>            |                                          |                  |                   |                   |                  |                   |                  |
| APTT                                   | normal                                   | normal           | normal            | increased (43.7)  | normal           | normal            | increased (45.7) |
| Prothrombin time (s)                   | normal                                   | normal           | normal            | normal            | normal           | normal            | normal           |
| D-dimer                                | increased (1.42)                         | increased (2.05) | increased (1.1)   | increased (0.95)  | increased (0.95) | increased (2.11)  | increased (1.17) |
| <b>Blood biochemistry</b>              |                                          |                  |                   |                   |                  |                   |                  |
| AST (U/L)                              | normal                                   | normal           | normal            | normal            | normal           | normal            | increased (153)  |
| ALT (U/L)                              | normal                                   | increased (47)   | normal            | normal            | normal           | normal            | increased (249)  |
| Albumin (g/L)                          | normal                                   | decreased (32.8) | decreased (30.2)  | decreased (33.2)  | decreased (34.2) | normal            | decreased (31.7) |
| Total bilirubin ( $\mu\text{mol/L}$ )  | normal                                   | normal           | normal            | normal            | normal           | normal            | normal           |
| Blood urea nitrogen (mmol/L)           | normal                                   | decreased (2.3)  | decreased (2.17)  | normal            | decreased (1.8)  | normal            | decreased (1.5)  |
| Serum creatinine ( $\mu\text{mol/L}$ ) | normal                                   | normal           | normal            | normal            | normal           | normal            | normal           |
| Creatine                               | normal                                   | increased        | normal            | normal            | -                | normal            | -                |

|                                       |                        |                  |                   |                  |                  |                   |                   |
|---------------------------------------|------------------------|------------------|-------------------|------------------|------------------|-------------------|-------------------|
| kinase (U/L)                          |                        | (188)            |                   |                  |                  |                   |                   |
| Lactate dehydrogenase (U/L)           | increased (323)        | increased (247)  | increased (213)   | normal           | increased (260)  | normal            | increased (354)   |
| Glucose (mmol/L)                      | increased (6.07)       | normal           | normal            | normal           | normal           | normal            | increased (6.47)  |
| <b>Infection-related biomarkers</b>   |                        |                  |                   |                  |                  |                   |                   |
| Procalcitonin (ng/mL)                 | increased (0.05)       | normal           | increased (0.12)  | -                | increased (0.22) | normal            | increased (0.07)  |
| C-reactive protein (mg/L)             | increased (33.2)       | increased (38.7) | increased (19.4)  | increased (20.8) | increased (49.5) | increased (20.9)  | increased (40)    |
| Erythrocyte sedimentation rate (mm/h) | increased (26)         | increased (34)   | normal            | -                | increased (81)   | -                 | increased (30)    |
| Serum ferritin (ng/mL)                | increased (151.9)      | normal           | increased (194.5) | normal           | normal           | normal            | increased (230.2) |
| Interleukin-6 (pg/mL)                 | increased (44.18)      | increased (14.5) | -                 | -                | -                | increased (30.33) | increased (43.72) |
| <b>Co-infection</b>                   |                        |                  |                   |                  |                  |                   |                   |
| Other viruses                         | No                     | influenza A      | No                | No               | influenza A      | No                | No                |
| Bacteria                              | Legionella pneumophila | No               | No                | No               | No               | No                | No                |
| Fungus                                | No                     | No               | No                | No               | No               | No                | No                |

**Supplementary Table 2 Maternal treatment of patients with COVID-19 pneumonia**

| Characteristics            | patients with COVID-19 pneumonia (n = 7) |                                                           |                                 |                                 |                           |                             |                |
|----------------------------|------------------------------------------|-----------------------------------------------------------|---------------------------------|---------------------------------|---------------------------|-----------------------------|----------------|
|                            | Case 1                                   | Case 2                                                    | Case 3                          | Case 4                          | Case 5                    | Case 6                      | Case 7         |
| Oxygen therapy             | Nasal catheter                           | Nasal catheter                                            | Nasal catheter                  | Nasal catheter                  | Nasal catheter            | Nasal catheter              | Nasal catheter |
| Antibiotic treatment       | moxifloxacin                             | Moxifloxacin; Azithromycin                                | Moxifloxacin; Cephalosporin     | moxifloxacin; Cephalosporin     | Cephalosporin; Ornidazole | moxifloxacin; Cephalosporin | Cephalosporin  |
| Antiviral treatment        | Ganciclovir, interferon, Lianhuaqingwen  | Oseltamivir, Arbidol, Jinyebaidu granules, Lianhuaqingwen | Interferon, Jinyebaidu granules | Interferon, Jinyebaidu granules | Arbidol                   | Interferon                  | Arbidol        |
| Glucocorticoids            | Yes                                      | Yes                                                       | Yes                             | Yes                             | No                        | Yes                         | No             |
| Intravenous immunoglobulin | No                                       | No                                                        | No                              | No                              | No                        | No                          | No             |

|                                        |                            |                                           |                                            |                              |                               |                                          |                                                  |
|----------------------------------------|----------------------------|-------------------------------------------|--------------------------------------------|------------------------------|-------------------------------|------------------------------------------|--------------------------------------------------|
| bulin therapy                          |                            |                                           |                                            |                              |                               |                                          |                                                  |
| Method of delivery                     | Cesarean section           | Cesarean section                          | Cesarean section                           | Cesarean section             | Cesarean section              | Cesarean section                         | Cesarean section                                 |
| Indication for C-section               | Mature; COVID-19 pneumonia | Mature; Precious fetus; Placentas racquet | Mature; Fetal distress; COVID-19 pneumonia | Mature; History of C-section | Mature; Failure trial vaginal | Mature; History of C-section; Parturient | Mature; History of C-section; COVID-19 pneumonia |
| Termination of gestational age (weeks) | 40                         | 38 <sup>+5</sup>                          | 41 <sup>+5</sup>                           | 37                           | 40 <sup>+6</sup>              | 38 <sup>+2</sup>                         | 38 <sup>+4</sup>                                 |
| Anesthesia mode                        | combined spinal-epidural   | combined spinal-epidural                  | general anesthesia                         | combined spinal-epidural     | combined spinal-epidural      | combined spinal-epidural                 | combined spinal-epidural                         |
| Intraoperative oxygen saturation       | 98%                        | 98%                                       | 98%                                        | 98%                          | 99%                           | 99%                                      | 99%                                              |
| Transfusion volume(ml)                 | 1000                       | 750                                       | 1500                                       | 1500                         | 1000                          | 500                                      | 1000                                             |
| Amount of bleeding (ml)                | 200                        | 300                                       | 100                                        | 50                           | 300                           | 200                                      | 200                                              |
| Oxytocin use (U)                       | 30                         | 20                                        | 30                                         | 30                           | 20                            | 30                                       | 20                                               |
